# Supplementary material
Source: Royal Society of Chemistry journal article supplement (doi:10.1039/d6cp00073h)
Supplement: d6cp00073h1.pdf [file d6cp00073h1.pdf]

**Structural and Electronic Properties of Metal Halide Perovskites using Non-Periodic Calculations: A Combined xTB, DFT, and ONIOM Framework**

Adrián Moro-Marín,<sup>a</sup> Gregorio García,<sup>a,\*</sup> Silverio Coco,<sup>a</sup>

*<sup>a</sup>IU CINQUIMA/Química Inorgánica, Facultad de Ciencias, Universidad de Valladolid, 47011 Valladolid (Spain).*

\*Corresponding author: [gregorio.garcia@uva.es](mailto:gregorio.garcia@uva.es) (GG)\*

**Supporting Information**

**Table SI.** Pb-I distances ( $d_{Pb-I}$ ) for cluster 1-1-1 optimized using the GFN2-xTB method. For bond labels, refer to figure to the right.

| Label | $d_{Pb-I}$ (Å) |
|-------|----------------|
| 1     | 3.63           |
| 2     | 2.90           |
| 3     | 3.55           |
| 4     | 2.83           |
| 5     | 3.77           |
| 6     | 3.23           |
| 7     | 2.92           |
| 8     | 2.90           |
| 9     | 2.89           |
| 10    | 4.19           |
| 11    | 3.25           |
| 12    | 2.92           |
| 13    | 2.90           |
| 14    | 2.89           |
| 15    | 4.13           |
| 16    | 2.94           |
| 17    | 3.38           |
| 18    | 2.87           |
| 19    | 2.84           |
| 20    | 3.77           |
| 21    | 2.93           |
| 22    | 2.86           |
| 23    | 3.08           |
| 24    | 3.60           |
| 25    | 2.83           |
| 26    | 2.99           |
| 27    | 3.17           |
| 28    | 2.90           |
| 29    | 4.81           |
| 30    | 2.83           |
| 31    | 2.95           |
| 32    | 3.18           |
| 33    | 3.58           |
| 34    | 2.97           |
| 35    | 3.78           |
| 36    | 4.15           |
| 37    | 2.92           |
| 38    | 3.13           |
| 39    | 2.81           |
| 40    | 3.96           |
| 41    | 2.82           |
| 42    | 4.27           |
| 43    | 3.71           |
| 44    | 2.99           |
| 45    | 3.45           |
| 46    | 3.52           |
| 47    | 3.62           |
| 48    | 3.03           |

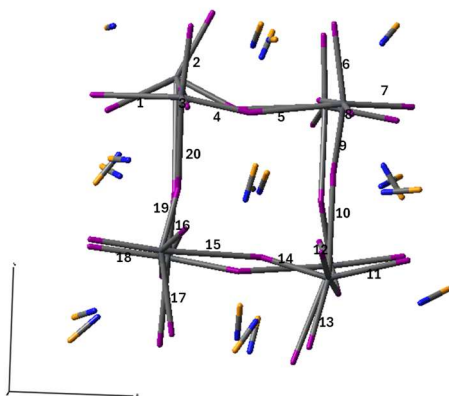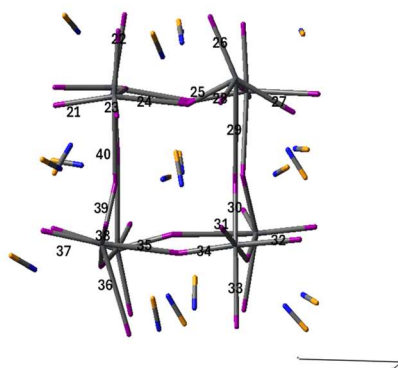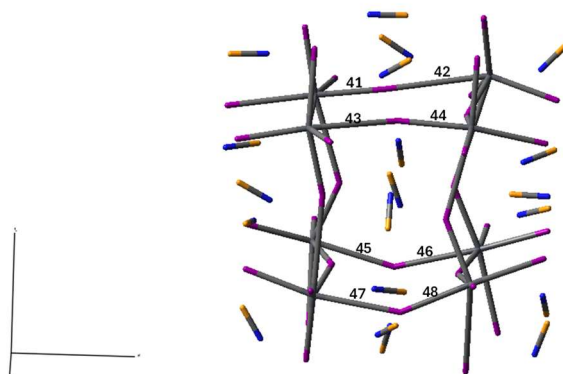

**Table SII.** Pb-I distances ( $d_{Pb-I}$ ) for cluster 2-1-1 optimized using the GFN2-xTB method. For bond labels, refer to figure to the right.

| Label | $d_{Pb-I}$ (Å) | $d_{Pb-I}$ (Å) |
|-------|----------------|----------------|
| 1     | 2.91           | 2.91           |
| 2     | 3.21           | 3.21           |
| 3     | 3.72           | 2.85           |
| 4     | 2.93           | 2.93           |
| 5     | 3.36           | 3.57           |
| 6     | 3.15           | 3.15           |
| 7     | 2.94           | 2.94           |
| 8     | 2.99           | 3.57           |
| 9     | 2.92           | 2.92           |
| 10    | 2.93           | 2.93           |
| 11    | 3.98           | 2.84           |
| 12    | 3.57           | 3.57           |
| 13    | 3.64           | 2.82           |
| 14    | 2.94           | 2.94           |
| 15    | 3.4            | 3.4            |
| 16    | 3.14           | 3.14           |
| 17    | 2.93           | 2.93           |
| 18    | 2.96           | 3.66           |
| 19    | 2.96           | 2.96           |
| 20    | 2.76           | 3.83           |
| 21    | 3.25           | 3.25           |
| 22    | 2.92           | 2.92           |
| 23    | 2.96           | 4.97           |
| 24    | 3.32           | 3.32           |
| 25    | 2.92           | 2.92           |
| 26    | 2.93           | 3.69           |
| 27    | 3.99           | 3.99           |
| 28    | 2.83           | 4.28           |
| 29    | 3.23           | 3.23           |
| 30    | 2.9            | 2.9            |
| 31    | 2.93           | 2.93           |
| 32    | 3.63           | 2.83           |
| 33    | 3.23           |                |
| 34    | 3.15           |                |
| 35    | 2.99           | 3.57           |
| 36    | 2.93           |                |
| 37    | 2.96           |                |
| 38    | 3.6            | 2.81           |
| 39    | 3.99           |                |
| 40    | 2.93           |                |
| 41    | 3.72           | 2.83           |
| 42    | 2.91           |                |
| 43    | 3.25           |                |
| 44    | 2.95           | 4.97           |
| 45    | 2.91           |                |
| 46    | 3.21           |                |
| 47    | 2.88           | 3.74           |
| 48    | 2.93           |                |

**Table SIII.** Pb-I distances ( $d_{Pb-I}$ ) for the central region of cluster 3-3-3 optimized using the GFN2-xTB method. For bond labels, refer to figure to the right.

| Label | $d_{Pb-I}$ (Å) |
|-------|----------------|
| 1     | 2.88           |
| 2     | 2.8            |
| 3     | 3.64           |
| 4     | 3.56           |
| 5     | 2.82           |
| 6     | 2.89           |
| 7     | 3.38           |
| 8     | 3.62           |
| 9     | 3.56           |
| 10    | 2.82           |
| 11    | 3.5            |
| 12    | 3.64           |
| 13    | 3.48           |
| 14    | 2.86           |
| 15    | 3.39           |
| 16    | 3.69           |
| 17    | 3.58           |
| 18    | 2.87           |
| 19    | 2.83           |
| 20    | 3.62           |
| 21    | 2.93           |
| 22    | 2.81           |
| 23    | 2.79           |
| 24    | 3.39           |
| 25    | 2.88           |
| 26    | 2.82           |
| 27    | 3.43           |
| 28    | 2.83           |
| 29    | 3.69           |
| 30    | 2.82           |
| 31    | 2.89           |
| 32    | 2.89           |
| 33    | 3.62           |
| 34    | 2.83           |
| 35    | 3.56           |
| 36    | 3.64           |
| 37    | 2.89           |
| 38    | 2.8            |
| 39    | 2.8            |
| 40    | 3.73           |
| 41    | 3.56           |
| 42    | 2.83           |
| 43    | 3.4            |
| 44    | 2.87           |
| 45    | 3.4            |
| 46    | 2.88           |
| 47    | 3.51           |
| 48    | 2.85           |

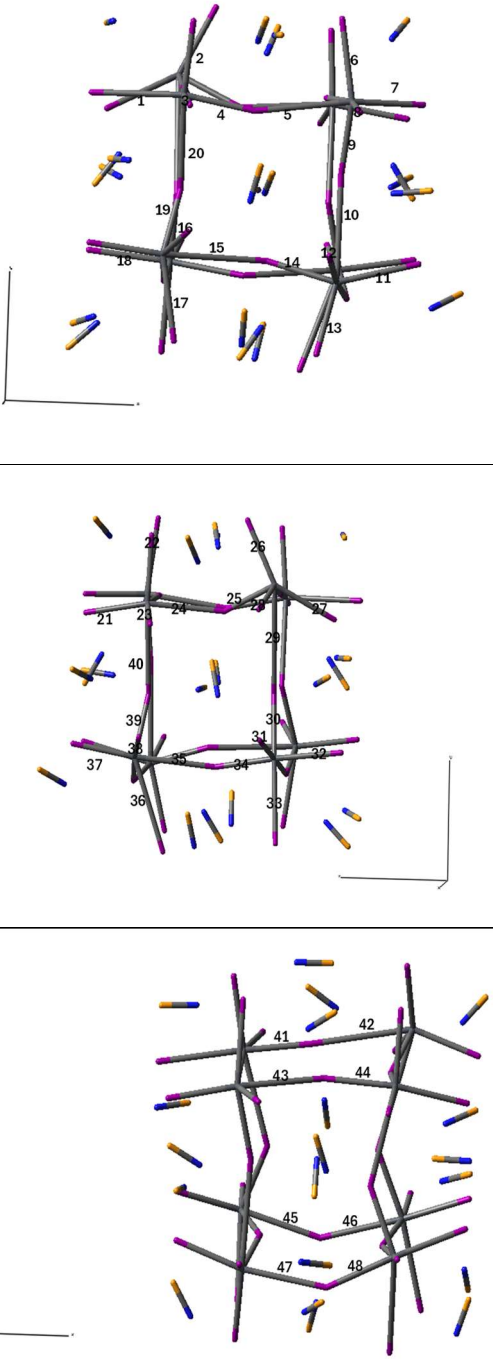

**Table SIV.** Pb-I distances ( $d_{Pb-I}$ ) for the central region of cluster 4-3-3 optimized using the GFN2-xTB method. For bond labels, refer to figure to the right.

| Label | $d_{Pb-I}$ (Å) | $d_{Pb-I}$ (Å) |
|-------|----------------|----------------|
| 1     | 3.50           |                |
| 2     | 2.85           |                |
| 3     | 2.84           | 3.58           |
| 4     | 3.69           |                |
| 5     | 2.81           | 3.67           |
| 6     | 3.67           |                |
| 7     | 2.87           |                |
| 8     | 2.80           | 3.75           |
| 9     | 2.79           |                |
| 10    | 2.85           |                |
| 11    | 3.67           | 2.80           |
| 12    | 2.82           |                |
| 13    | 3.51           | 2.81           |
| 14    | 3.86           |                |
| 15    | 3.60           |                |
| 16    | 2.82           | 3.62           |
| 17    | 2.88           |                |
| 18    | 3.75           |                |
| 19    | 3.55           | 2.83           |
| 20    | 2.85           |                |
| 21    | 3.51           | 2.84           |
| 22    | 2.84           |                |
| 23    | 3.55           |                |
| 24    | 3.64           | 2.79           |
| 25    | 3.29           |                |
| 26    | 3.79           |                |
| 27    | 2.91           | 3.50           |
| 28    | 3.69           |                |
| 29    | 2.86           | 3.44           |
| 30    | 2.84           |                |
| 31    | 2.90           |                |
| 32    | 3.70           | 2.83           |
| 33    | 2.84           |                |
| 34    | 3.62           | 2.84           |
| 35    | 3.45           |                |
| 36    | 2.93           |                |
| 37    | 3.34           | 2.92           |
| 38    | 3.47           |                |
| 39    | 2.88           |                |
| 40    | 3.67           | 2.83           |
| 41    | 3.68           |                |
| 42    | 2.91           |                |
| 43    | 3.34           | 2.92           |
| 44    | 3.30           |                |
| 45    | 3.53           |                |
| 46    | 2.88           | 3.53           |
| 47    | 2.84           |                |
| 48    | 3.25           |                |
| 49    | 2.92           | 3.55           |
| 50    | 2.81           |                |

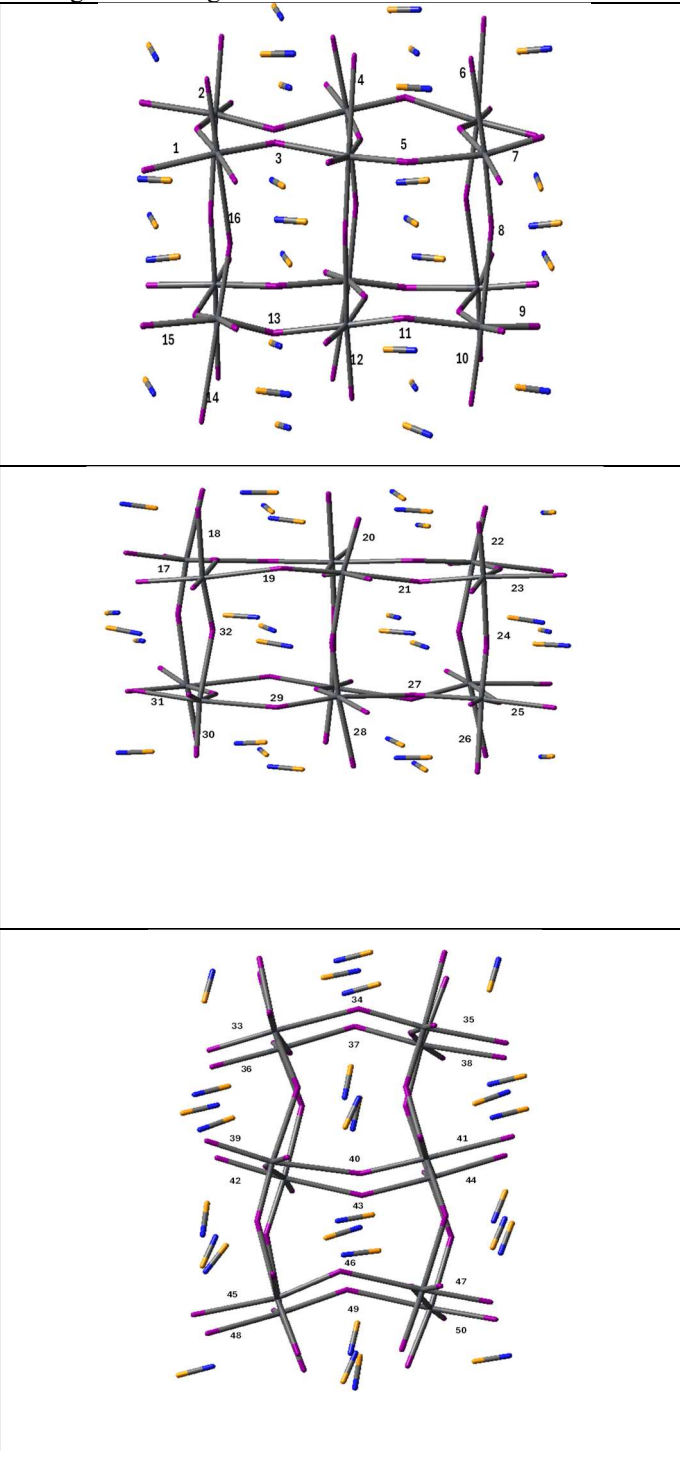

**Table SV.** Pb-I distances ( $d_{Pb-I}$ ) for the central region of cluster 4-4-4 optimized using the GFN2-xTB method. For bond labels, refer to Table S4.

| Label | $d_{Pb-I}$ (Å) | $d_{Pb-I}$ (Å) | Label | $d_{Pb-I}$ (Å) | $d_{Pb-I}$ (Å) |
|-------|----------------|----------------|-------|----------------|----------------|
| 1     | 3.42           |                | 62    | 3.47           | 2.81           |
| 2     | 2.87           |                | 63    | 3.67           | 2.83           |
| 3     | 2.84           | 3.48           | 64    | 2.85           | 3.61           |
| 4     | 3.62           |                | 65    | 3.59           |                |
| 5     | 2.85           | 3.49           | 66    | 3.62           |                |
| 6     | 3.66           |                | 67    | 2.87           |                |
| 7     | 2.86           |                | 68    | 2.82           | 3.7            |
| 8     | 2.81           | 3.78           | 69    | 2.85           |                |
| 9     | 2.85           |                | 70    | 3.41           |                |
| 10    | 2.78           |                | 71    | 2.83           | 3.72           |
| 11    | 3.63           | 2.85           | 72    | 2.84           |                |
| 12    | 2.82           |                | 73    | 3.57           |                |
| 13    | 3.61           | 2.85           | 74    | 2.85           |                |
| 14    | 3.76           |                | 75    | 3.72           | 2.91           |
| 15    | 3.46           |                | 76    | 3.73           | 2.82           |
| 16    | 2.86           |                | 77    | 2.81           | 3.57           |
| 17    | 3.67           |                | 78    | 3.48           |                |
| 18    | 3.54           | 2.83           | 79    | 3.69           |                |
| 19    | 3.59           |                | 80    | 2.86           |                |
| 20    | 3.58           | 2.83           | 81    | 2.79           | 3.7            |
| 21    | 3.69           |                | 82    | 2.90           |                |
| 22    | 3.62           |                | 83    | 3.32           |                |
| 23    | 2.83           | 3.66           | 84    | 2.79           | 3.74           |
| 24    | 3.52           |                | 85    | 2.90           |                |
| 25    | 2.83           |                | 86    | 3.52           |                |
| 26    | 2.86           | 3.60           | 87    | 2.82           |                |
| 27    | 2.80           |                | 88    | 3.32           |                |
| 28    | 2.80           | 3.67           | 89    | 3.78           |                |
| 29    | 2.82           |                | 90    | 2.85           |                |
| 30    | 2.84           |                |       |                |                |
| 31    | 2.90           |                |       |                |                |
| 32    | 2.85           | 3.55           |       |                |                |
| 33    | 2.83           |                |       |                |                |
| 34    | 2.84           |                |       |                |                |
| 35    | 3.68           | 2.85           |       |                |                |
| 36    | 3.54           |                |       |                |                |
| 37    | 3.35           |                |       |                |                |
| 38    | 2.82           | 3.48           |       |                |                |
| 39    | 2.90           |                |       |                |                |
| 40    | 2.84           |                |       |                |                |
| 41    | 3.57           | 2.82           |       |                |                |
| 42    | 3.72           |                |       |                |                |
| 43    | 3.35           |                |       |                |                |
| 44    | 2.89           | 3.47           |       |                |                |
| 45    | 2.85           |                |       |                |                |
| 46    | 2.84           |                |       |                |                |
| 47    | 3.56           | 2.84           |       |                |                |
| 48    | 3.46           |                |       |                |                |
| 49    | 3.70           |                |       |                |                |
| 50    | 2.83           |                |       |                |                |
| 51    | 3.45           |                |       |                |                |
| 52    | 2.85           |                |       |                |                |
| 53    | 3.77           | 2.83           |       |                |                |
| 54    | 2.81           |                |       |                |                |
| 55    | 2.85           |                |       |                |                |
| 56    | 3.68           |                |       |                |                |
| 57    | 3.72           | 2.82           |       |                |                |
| 58    | 3.61           |                |       |                |                |
| 59    | 2.92           |                |       |                |                |
| 60    | 2.82           |                |       |                |                |
| 61    | 3.69           |                |       |                |                |

**Table SVI.** Molecular orbital energies for clusters 1-1-1, 2-1-1, 3-3-3, 4-3-3 and 4-4-4. Units are in eV

|                    | PBE0-D4/Def2-TZVP |       | ONIOM<br>PBE0-D4/Def2-TZVP:GFN2- <i>xTB</i> |       |       |
|--------------------|-------------------|-------|---------------------------------------------|-------|-------|
|                    | 1-1-1             | 2-1-1 | 3-3-3                                       | 4-3-3 | 4-4-4 |
| HOMO-9             | -6.30             | -6.09 | -2.28                                       | -2.02 | -1.81 |
| HOMO-8             | -6.23             | -5.98 | -2.21                                       | -1.95 | -1.78 |
| HOMO-7             | -6.14             | -5.94 | -2.03                                       | -1.89 | -1.70 |
| HOMO-6             | -6.12             | -5.88 | -1.94                                       | -1.81 | -1.68 |
| HOMO-5             | -6.09             | -5.83 | -1.89                                       | -1.81 | -1.64 |
| HOMO-4             | -6.00             | -5.80 | -1.77                                       | -1.60 | -1.60 |
| HOMO-3             | -5.85             | -5.72 | -1.74                                       | -1.56 | -1.57 |
| HOMO-2             | -5.65             | -5.65 | -1.65                                       | -1.45 | -1.52 |
| HOMO-1             | -5.57             | -5.60 | -1.48                                       | -1.41 | -1.39 |
| HOMO               | -5.37             | -5.51 | -1.35                                       | -1.13 | -1.23 |
| LUMO               | -1.56             | -1.44 | 0.46                                        | 0.86  | 0.49  |
| LUMO+1             | -1.41             | -1.39 | 0.51                                        | 0.97  | 0.68  |
| LUMO+2             | -1.17             | -1.35 | 0.63                                        | 1.16  | 0.77  |
| LUMO+3             | -1.13             | -1.25 | 0.74                                        | 1.33  | 0.96  |
| LUMO+4             | -1.05             | -1.20 | 0.99                                        | 1.36  | 1.00  |
| LUMO+5             | -0.96             | -1.05 | 1.02                                        | 1.45  | 1.17  |
| LUMO+6             | -0.90             | -0.99 | 1.17                                        | 1.52  | 1.19  |
| LUMO+7             | -0.87             | -0.97 | 1.23                                        | 1.63  | 1.27  |
| LUMO+8             | -0.86             | -0.96 | 1.35                                        | 1.67  | 1.28  |
| LUMO+9             | -0.60             | -0.93 | 1.49                                        | 1.71  | 1.41  |
| $\Delta E_{gap}^a$ | 3.81              | 4.07  | 1.81                                        | 1.99  | 1.72  |

<sup>a</sup> $\Delta E_{gap}$  defined as the energy difference between HOMO and LUMO orbitals.

**Table SVII.** Calculated vertical excitations energies ( $\Delta E_{TD}$ ), oscillator strengths ( $f$ ) and main configurations for cluster 1-1-1 using TD-PBE0-D4/Def2-TZVP for the first 50 excited states.

|    | $\Delta E_{TD}$ (eV) | $f$    | Configuration <sup>a</sup>                                                                                                                 |    | $\Delta E_{TD}$ (eV) | $f$    | Configuration <sup>a</sup>                                                                                                                                         |
|----|----------------------|--------|--------------------------------------------------------------------------------------------------------------------------------------------|----|----------------------|--------|--------------------------------------------------------------------------------------------------------------------------------------------------------------------|
| 1  | 3.37                 | 0.0496 | HOMO-2 → LUMO (75%)<br>HOMO-1 → LUMO (9%)<br>HOMO → LUMO (5%)                                                                              | 26 | 4.11                 | 0.0239 | HOMO-6 → LUMO+1 (5%)<br>HOMO-3 → LUMO+5 (5%)<br>HOMO-1 → LUMO+4 (10%)<br>HOMO-1 → LUMO+8 (7%)<br>HOMO → LUMO+6 (12%)<br>HOMO → LUMO+7 (8%)<br>HOMO → LUMO+8 (8%)   |
| 2  | 3.46                 | 0.0004 | HOMO-2 → LUMO (6%)<br>HOMO → LUMO (89%)                                                                                                    | 27 | 4.11                 | 0.0243 | HOMO-8 → LUMO (5%)<br>HOMO-7 → LUMO+1 (5%)<br>HOMO-6 → LUMO+1 (8%)<br>HOMO-1 → LUMO+4 (15%)<br>HOMO-1 → LUMO+7 (7%)<br>HOMO-1 → LUMO+8 (5%)<br>HOMO → LUMO+9 (10%) |
| 3  | 3.55                 | 0.0053 | HOMO-1 → LUMO (7%)<br>HOMO → LUMO+1 (87%)                                                                                                  | 28 | 4.11                 | 0.0175 | HOMO-19 → LUMO (5%)<br>HOMO-11 → LUMO (21%)<br>HOMO-9 → LUMO (13%)<br>HOMO-6 → LUMO (8%)                                                                           |
| 4  | 3.58                 | 0.0011 | HOMO-2 → LUMO (6%)<br>HOMO-1 → LUMO (78%)<br>HOMO → LUMO+1 (8%)                                                                            | 29 | 4.12                 | 0.0484 | HOMO-8 → LUMO (20%)<br>HOMO-7 → LUMO (6%)<br>HOMO-6 → LUMO (7%)<br>HOMO-5 → LUMO (9%)<br>HOMO-3 → LUMO+5 (15%)<br>HOMO-1 → LUMO+5 (7%)                             |
| 5  | 3.72                 | 0.0292 | HOMO → LUMO+2 (45%)<br>HOMO → LUMO+3 (11%)<br>HOMO → LUMO+4 (25%)<br>HOMO → LUMO+7 (5%)                                                    | 30 | 4.13                 | 0.0241 | HOMO-3 → LUMO+5 (7%)<br>HOMO-2 → LUMO+2 (13%)<br>HOMO-2 → LUMO+6 (9%)<br>HOMO-2 → LUMO+8 (9%)<br>HOMO → LUMO+6 (8%)<br>HOMO → LUMO+8 (14%)                         |
| 6  | 3.75                 | 0.0735 | HOMO-6 → LUMO (7%)<br>HOMO-4 → LUMO (55%)<br>HOMO-3 → LUMO (7%)<br>HOMO-2 → LUMO+1 (5%)                                                    | 31 | 4.14                 | 0.1782 | HOMO-7 → LUMO (8%)<br>HOMO-7 → LUMO+1 (7%)<br>HOMO-6 → LUMO+1 (11%)<br>HOMO-3 → LUMO+5 (9%)<br>HOMO-1 → LUMO+5 (32%)                                               |
| 7  | 3.79                 | 0.0141 | HOMO-4 → LUMO+1 (5%)<br>HOMO-2 → LUMO+1 (30%)<br>HOMO-1 → LUMO+1 (45%)                                                                     | 32 | 4.15                 | 0.0006 | HOMO-3 → LUMO+5 (18%)<br>HOMO-1 → LUMO+4 (13%)<br>HOMO-1 → LUMO+5 (14%)<br>HOMO-1 → LUMO+9 (6%)<br>HOMO → LUMO+8 (13%)<br>HOMO → LUMO+9 (10%)                      |
| 8  | 3.82                 | 0.0646 | HOMO-4 → LUMO+1 (21%)<br>HOMO-2 → LUMO+1 (9%)<br>HOMO-1 → LUMO+1 (24%)<br>HOMO → LUMO+2 (12%)                                              | 33 | 4.18                 | 0.0541 | HOMO-8 → LUMO+1 (5%)<br>HOMO-4 → LUMO+2 (5%)<br>HOMO-3 → LUMO+5 (9%)<br>HOMO-1 → LUMO+5 (24%)<br>HOMO → LUMO+8 (7%)<br>HOMO → LUMO+9 (23%)                         |
| 9  | 3.83                 | 0.0181 | HOMO-1 → LUMO+1 (15%)<br>HOMO → LUMO+2 (32%)<br>HOMO → LUMO+3 (19%)<br>HOMO → LUMO+6 (5%)                                                  | 34 | 4.19                 | 0.1345 | HOMO-8 → LUMO+1 (22%)<br>HOMO-7 → LUMO+1 (5%)<br>HOMO-4 → LUMO+1 (7%)<br>HOMO-4 → LUMO+2 (13%)<br>HOMO-3 → LUMO+5 (7%)<br>HOMO → LUMO+9 (8%)                       |
| 10 | 3.84                 | 0.0347 | HOMO-6 → LUMO+1 (5%)<br>HOMO-4 → LUMO+1 (22%)<br>HOMO-3 → LUMO (6%)<br>HOMO-2 → LUMO+1 (42%)<br>HOMO-1 → LUMO+1 (7%)                       | 35 | 4.21                 | 0.0257 | HOMO-8 → LUMO+1 (15%)<br>HOMO-6 → LUMO+1 (11%)<br>HOMO-4 → LUMO (7%)<br>HOMO-4 → LUMO+2 (29%)                                                                      |
| 11 | 3.86                 | 0.0218 | HOMO-2 → LUMO+3 (7%)<br>HOMO → LUMO+3 (36%)<br>HOMO → LUMO+5 (6%)<br>HOMO → LUMO+6 (7%)<br>HOMO → LUMO+7 (11%)                             | 36 | 4.21                 | 0.0192 | HOMO-9 → LUMO (10%)<br>HOMO-8 → LUMO+1 (7%)<br>HOMO-4 → LUMO+3 (8%)<br>HOMO-3 → LUMO+3 (11%)<br>HOMO-3 → LUMO+4 (15%)                                              |
| 12 | 3.88                 | 0.0297 | HOMO-3 → LUMO (7%)<br>HOMO-2 → LUMO+2 (7%)<br>HOMO-2 → LUMO+3 (26%)<br>HOMO-2 → LUMO+6 (8%)<br>HOMO-2 → LUMO+8 (9%)<br>HOMO → LUMO+3 (17%) | 37 | 4.22                 | 0.0053 | HOMO-2 → LUMO+2 (7%)<br>HOMO-2 → LUMO+3 (11%)<br>HOMO-2 → LUMO+4 (54%)                                                                                             |
| 13 | 3.88                 | 0.0105 | HOMO-7 → LUMO (8%)<br>HOMO-4 → LUMO (7%)                                                                                                   | 38 | 4.23                 | 0.0241 | HOMO-9 → LUMO (10%)<br>HOMO-5 → LUMO (41%)                                                                                                                         |

|    |      |        |                                                                                                                                                |    |      |        |                                                                                                                                                                        |
|----|------|--------|------------------------------------------------------------------------------------------------------------------------------------------------|----|------|--------|------------------------------------------------------------------------------------------------------------------------------------------------------------------------|
|    |      |        | HOMO-4 → LUMO+1 (5%)<br>HOMO-3 → LUMO (58%)                                                                                                    |    |      |        | HOMO-1 → LUMO+7 (14%)                                                                                                                                                  |
| 14 | 3.94 | 0.0070 | HOMO-1 → LUMO+2 (6%)<br>HOMO-1 → LUMO+3 (13%)<br>HOMO → LUMO+4 (35%)<br>HOMO → LUMO+5 (21%)                                                    | 39 | 4.23 | 0.0449 | HOMO-5 → LUMO (18%)<br>HOMO-2 → LUMO+4 (8%)<br>HOMO-1 → LUMO+7 (24%)<br>HOMO-1 → LUMO+9 (6%)<br>HOMO → LUMO+9 (6%)                                                     |
| 15 | 3.94 | 0.0500 | HOMO-3 → LUMO+1 (42%)<br>HOMO-3 → LUMO+2 (14%)<br>HOMO-3 → LUMO+3 (6%)<br>HOMO-3 → LUMO+4 (6%)<br>HOMO → LUMO+5 (7%)                           | 40 | 4.26 | 0.0054 | HOMO-9 → LUMO (8%)<br>HOMO-3 → LUMO+2 (5%)<br>HOMO-3 → LUMO+3 (5%)<br>HOMO-1 → LUMO+6 (17%)<br>HOMO-1 → LUMO+8 (26%)                                                   |
| 16 | 3.96 | 0.0052 | HOMO-3 → LUMO+1 (6%)<br>HOMO-1 → LUMO+2 (5%)<br>HOMO-1 → LUMO+3 (10%)<br>HOMO → LUMO+5 (46%)<br>HOMO → LUMO+6 (9%)<br>HOMO → LUMO+7 (7%)       | 41 | 4.26 | 0.0023 | HOMO-11 → LUMO (7%)<br>HOMO-9 → LUMO (15%)<br>HOMO-5 → LUMO (5%)<br>HOMO-1 → LUMO+6 (6%)<br>HOMO-1 → LUMO+8 (11%)<br>HOMO → LUMO+10 (5%)                               |
| 17 | 3.99 | 0.0217 | HOMO-1 → LUMO+2 (12%)<br>HOMO-1 → LUMO+3 (20%)<br>HOMO → LUMO+4 (20%)<br>HOMO → LUMO+6 (14%)                                                   | 42 | 4.27 | 0.0604 | HOMO → LUMO+10 (67%)                                                                                                                                                   |
| 18 | 4.01 | 0.0169 | HOMO-3 → LUMO+1 (7%)<br>HOMO-2 → LUMO+2 (24%)<br>HOMO-2 → LUMO+3 (20%)<br>HOMO-2 → LUMO+4 (17%)<br>HOMO-1 → LUMO+3 (7%)                        | 43 | 4.28 | 0.0131 | HOMO-7 → LUMO+1 (8%)<br>HOMO-7 → LUMO+3 (5%)<br>HOMO-4 → LUMO+3 (12%)<br>HOMO-4 → LUMO+4 (5%)<br>HOMO-3 → LUMO+2 (14%)<br>HOMO-3 → LUMO+4 (8%)<br>HOMO-1 → LUMO+8 (7%) |
| 19 | 4.02 | 0.0025 | HOMO-7 → LUMO (18%)<br>HOMO-6 → LUMO (28%)<br>HOMO-4 → LUMO (14%)<br>HOMO-4 → LUMO+1 (5%)                                                      | 44 | 4.30 | 0.0023 | HOMO-8 → LUMO (5%)<br>HOMO-4 → LUMO+3 (9%)<br>HOMO-3 → LUMO+2 (10%)<br>HOMO-3 → LUMO+3 (23%)                                                                           |
| 20 | 4.02 | 0.0463 | HOMO-1 → LUMO+2 (21%)<br>HOMO-1 → LUMO+4 (12%)<br>HOMO-1 → LUMO+6 (9%)<br>HOMO-1 → LUMO+8 (7%)<br>HOMO → LUMO+7 (13%)                          | 45 | 4.30 | 0.0093 | HOMO-17 → LUMO (8%)<br>HOMO-16 → LUMO (7%)<br>HOMO-11 → LUMO (8%)<br>HOMO-9 → LUMO (10%)<br>HOMO-8 → LUMO (7%)<br>HOMO-3 → LUMO+3 (10%)                                |
| 21 | 4.03 | 0.0889 | HOMO-3 → LUMO+1 (8%)<br>HOMO-3 → LUMO+2 (5%)<br>HOMO-1 → LUMO+2 (12%)<br>HOMO-1 → LUMO+3 (16%)<br>HOMO-1 → LUMO+6 (11%)<br>HOMO → LUMO+7 (10%) | 46 | 4.31 | 0.0181 | HOMO-7 → LUMO+1 (11%)<br>HOMO-3 → LUMO+6 (6%)<br>HOMO-3 → LUMO+7 (8%)<br>HOMO-3 → LUMO+8 (9%)<br>HOMO-2 → LUMO+5 (7%)<br>HOMO-2 → LUMO+7 (10%)<br>HOMO-1 → LUMO+7 (7%) |
| 22 | 4.05 | 0.0289 | HOMO-3 → LUMO+1 (12%)<br>HOMO-3 → LUMO+2 (16%)<br>HOMO-3 → LUMO+4 (13%)<br>HOMO-1 → LUMO+2 (28%)                                               | 47 | 4.32 | 0.0025 | HOMO-2 → LUMO+5 (26%)<br>HOMO-2 → LUMO+6 (22%)<br>HOMO-2 → LUMO+7 (16%)<br>HOMO-2 → LUMO+8 (11%)                                                                       |
| 23 | 4.08 | 0.0284 | HOMO-8 → LUMO (16%)<br>HOMO-7 → LUMO (20%)<br>HOMO-4 → LUMO+2 (9%)<br>HOMO-1 → LUMO+8 (5%)                                                     | 48 | 4.32 | 0.0214 | HOMO-7 → LUMO+1 (17%)<br>HOMO-5 → LUMO+1 (24%)<br>HOMO-3 → LUMO+4 (9%)                                                                                                 |
| 24 | 4.09 | 0.0330 | HOMO-1 → LUMO+4 (29%)<br>HOMO-1 → LUMO+6 (8%)<br>HOMO → LUMO+7 (19%)<br>HOMO → LUMO+8 (12%)                                                    | 49 | 4.34 | 0.0046 | HOMO-8 → LUMO+1 (9%)<br>HOMO-7 → LUMO+1 (6%)<br>HOMO-6 → LUMO+1 (17%)<br>HOMO-5 → LUMO+1 (46%)                                                                         |
| 25 | 4.09 | 0.0090 | HOMO-2 → LUMO+2 (15%)<br>HOMO-2 → LUMO+6 (7%)<br>HOMO-2 → LUMO+8 (7%)<br>HOMO → LUMO+6 (8%)<br>HOMO → LUMO+8 (14%)                             | 50 | 4.36 | 0.0410 | HOMO-6 → LUMO+2 (13%)<br>HOMO-4 → LUMO+3 (10%)<br>HOMO-4 → LUMO+4 (23%)<br>HOMO-2 → LUMO+5 (13%)                                                                       |

<sup>a</sup> Percentage contribution in parentheses

**Table SVIII.** Calculated vertical excitations energies ( $\Delta E_{TD}$ ), oscillator strengths ( $f$ ) and main configurations for cluster 2-1-1 using TD-PBE0-D4/Def2-TZVP for the first 50 excited states.

|    | $\Delta E_{TD}$ (eV) | $f$    | Configuration <sup>a</sup>                                                                                                                                                                                   |    | $\Delta E_{TD}$ (eV) | $f$  | Configuration <sup>a</sup>                                                                                                                                         |
|----|----------------------|--------|--------------------------------------------------------------------------------------------------------------------------------------------------------------------------------------------------------------|----|----------------------|------|--------------------------------------------------------------------------------------------------------------------------------------------------------------------|
| 1  | 3.49                 | 0.0434 | HOMO-2 → LUMO (73%)<br>HOMO → LUMO (6%)                                                                                                                                                                      | 26 | 26                   | 4.01 | HOMO-7 → LUMO+1 (5%)<br>HOMO-5 → LUMO (7%)<br>HOMO-5 → LUMO+2 (7%)<br>HOMO-3 → LUMO+3 (26%)<br>HOMO → LUMO+3 (6%)                                                  |
| 2  | 3.61                 | 0.0247 | HOMO-2 → LUMO (5%)<br>HOMO → LUMO (83%)                                                                                                                                                                      | 27 | 27                   | 4.02 | HOMO-8 → LUMO+1 (8%)<br>HOMO-7 → LUMO+1 (5%)<br>HOMO-7 → LUMO+2 (14%)<br>HOMO-6 → LUMO+2 (6%)                                                                      |
| 3  | 3.65                 | 0.0512 | HOMO-3 → LUMO+1 (9%)<br>HOMO-1 → LUMO (11%)<br>HOMO-1 → LUMO+1 (22%)<br>HOMO-1 → LUMO+2 (24%)                                                                                                                | 28 | 28                   | 4.02 | HOMO-3 → LUMO+4 (14%)<br>HOMO-2 → LUMO+1 (26%)<br>HOMO-2 → LUMO+2 (9%)                                                                                             |
| 4  | 3.68                 | 0.1229 | HOMO-6 → LUMO+1 (16%)<br>HOMO-5 → LUMO+1 (8%)<br>HOMO-3 → LUMO+1 (18%)<br>HOMO-3 → LUMO+2 (9%)<br>HOMO-1 → LUMO+2 (16%)                                                                                      | 29 | 29                   | 4.04 | HOMO-8 → LUMO+2 (6%)<br>HOMO-5 → LUMO (1%)<br>HOMO-5 → LUMO+2 (12%)<br>HOMO-1 → LUMO+6 (5%)                                                                        |
| 5  | 3.72                 | 0.0265 | HOMO-3 → LUMO+1 (6%)<br>HOMO-1 → LUMO (5%)<br>HOMO-1 → LUMO+1 (38%)<br>HOMO-1 → LUMO+2 (7%)<br>HOMO-1 → LUMO+4 (11%)<br>HOMO → LUMO+1 (9%)                                                                   | 30 | 30                   | 4.04 | HOMO-7 → LUMO+1 (6%)<br>HOMO-6 → LUMO (8%)<br>HOMO-6 → LUMO+2 (5%)<br>HOMO-6 → LUMO+4 (7%)<br>HOMO-5 → LUMO+2 (9%)<br>HOMO-5 → LUMO+3 (6%)<br>HOMO-3 → LUMO+3 (6%) |
| 6  | 3.74                 | 0.0687 | HOMO-3 → LUMO+2 (7%)<br>HOMO-1 → LUMO (12%)<br>HOMO-1 → LUMO+1 (5%)<br>HOMO-1 → LUMO+2 (9%)<br>HOMO-1 → LUMO+3 (9%)<br>HOMO → LUMO+1 (11%)<br>HOMO → LUMO+2 (21%)                                            | 31 | 31                   | 4.05 | HOMO-5 → LUMO+2 (5%)<br>HOMO-4 → LUMO+4 (9%)<br>HOMO-3 → LUMO+4 (5%)<br>HOMO-1 → LUMO+21 (6%)                                                                      |
| 7  | 3.75                 | 0.0174 | HOMO-1 → LUMO (54%)<br>HOMO-1 → LUMO+1 (9%)<br>HOMO-1 → LUMO+2 (13%)<br>HOMO → LUMO+2 (5%)                                                                                                                   | 32 | 32                   | 4.05 | HOMO-7 → LUMO+2 (5%)<br>HOMO-5 → LUMO (8%)<br>HOMO-1 → LUMO+7 (9%)<br>HOMO-1 → LUMO+8 (7%)                                                                         |
| 8  | 3.78                 | 0.1481 | HOMO-6 → LUMO+1 (7%)<br>HOMO-5 → LUMO+1 (6%)<br>HOMO → LUMO+1 (39%)<br>HOMO → LUMO+2 (15%)                                                                                                                   | 33 | 33                   | 4.06 | HOMO0 → LUMO+1 (7%)<br>HOMO-8 → LUMO+2 (6%)<br>HOMO-2 → LUMO+3 (6%)                                                                                                |
| 9  | 3.80                 | 0.0289 | HOMO-8 → LUMO (5%)<br>HOMO-7 → LUMO (5%)<br>HOMO-4 → LUMO (10%)<br>HOMO-3 → LUMO (18%)<br>HOMO → LUMO+2 (10%)<br>HOMO → LUMO+4 (6%)                                                                          | 34 | 34                   | 4.06 | HOMO-6 → LUMO+2 (10%)<br>HOMO-3 → LUMO+4 (5%)<br>HOMO-1 → LUMO+6 (6%)                                                                                              |
| 10 | 3.83                 | 0.0279 | HOMO-4 → LUMO (12%)<br>HOMO-3 → LUMO+1 (6%)<br>HOMO-3 → LUMO+2 (8%)<br>HOMO-1 → LUMO+3 (7%)<br>HOMO-1 → LUMO+4 (6%)<br>HOMO → LUMO+1 (5%)<br>HOMO → LUMO+2 (10%)<br>HOMO → LUMO+4 (8%)<br>HOMO → LUMO+5 (6%) | 35 | 35                   | 4.08 | HOMO-9 → LUMO+1 (6%)<br>HOMO-8 → LUMO+2 (5%)<br>HOMO-7 → LUMO+1 (8%)<br>HOMO-5 → LUMO+4 (5%)<br>HOMO-1 → LUMO+5 (13%)<br>HOMO-1 → LUMO+6 (9%)                      |
| 11 | 3.83                 | 0.1600 | HOMO-1 → LUMO+2 (7%)<br>HOMO-1 → LUMO+3 (21%)<br>HOMO-1 → LUMO+4 (18%)<br>HOMO → LUMO+1 (8%)<br>HOMO → LUMO+2 (7%)                                                                                           | 36 | 36                   | 4.08 | HOMO-8 → LUMO+2 (5%)<br>HOMO-7 → LUMO+2 (8%)<br>HOMO-1 → LUMO+8 (10%)<br>HOMO-1 → LUMO+9 (8%)                                                                      |
| 12 | 3.84                 | 0.0431 | HOMO-3 → LUMO+1 (9%)<br>HOMO-3 → LUMO+2 (8%)<br>HOMO → LUMO+3 (15%)<br>HOMO → LUMO+4 (13%)                                                                                                                   | 37 | 37                   | 4.09 | HOMO-3 → LUMO+4 (7%)<br>HOMO-2 → LUMO+3 (18%)<br>HOMO-2 → LUMO+5 (11%)<br>HOMO → LUMO+10 (5%)                                                                      |
| 13 | 3.86                 | 0.0074 | HOMO-3 → LUMO+3 (5%)<br>HOMO-2 → LUMO+1 (5%)<br>HOMO-2 → LUMO+2 (11%)<br>HOMO-2 → LUMO+3 (12%)<br>HOMO-2 → LUMO+5 (20%)                                                                                      | 38 | 38                   | 4.09 | HOMO-4 → LUMO+1 (32%)<br>HOMO-4 → LUMO+2 (24%)<br>HOMO-2 → LUMO+4 (6%)                                                                                             |
| 14 | 3.88                 | 0.0362 | HOMO-4 → LUMO (17%)<br>HOMO-3 → LUMO+2 (6%)                                                                                                                                                                  | 39 | 39                   | 4.10 | HOMO-1 → LUMO+5 (9%)<br>HOMO-1 → LUMO+6 (11%)                                                                                                                      |

|    |      |        |                                                                                                                                                               |    |    |      |                                                                                                                                                                |
|----|------|--------|---------------------------------------------------------------------------------------------------------------------------------------------------------------|----|----|------|----------------------------------------------------------------------------------------------------------------------------------------------------------------|
|    |      |        | HOMO-2 → LUMO+3 (6%)<br>HOMO-1 → LUMO+3 (10%)<br>HOMO → LUMO+4 (17%)                                                                                          |    |    |      | HOMO → LUMO+10 (9%)                                                                                                                                            |
| 15 | 3.88 | 0.0048 | HOMO-8 → LUMO (12%)<br>HOMO-7 → LUMO (8%)<br>HOMO-4 → LUMO (7%)<br>HOMO-2 → LUMO+2 (12%)<br>HOMO → LUMO+3 (20%)                                               | 40 | 40 | 4.11 | HOMO-2 → LUMO+4 (15%)<br>HOMO → LUMO+6 (7%)<br>HOMO → LUMO+9 (15%)                                                                                             |
| 16 | 3.89 | 0.0099 | HOMO-7 → LUMO (5%)<br>HOMO-3 → LUMO+2 (9%)<br>HOMO-2 → LUMO+1 (10%)<br>HOMO-2 → LUMO+2 (32%)<br>HOMO-2 → LUMO+3 (10%)                                         | 41 | 41 | 4.11 | HOMO-4 → LUMO+2 (13%)<br>HOMO-2 → LUMO+4 (15%)                                                                                                                 |
| 17 | 3.90 | 0.0062 | HOMO-4 → LUMO (7%)<br>HOMO-3 → LUMO+1 (5%)<br>HOMO-3 → LUMO+2 (12%)<br>HOMO-1 → LUMO+4 (11%)<br>HOMO → LUMO+4 (6%)<br>HOMO → LUMO+5 (10%)                     | 42 | 42 | 4.12 | HOMO-4 → LUMO+2 (16%)<br>HOMO-2 → LUMO+4 (6%)<br>HOMO → LUMO+5 (13%)<br>HOMO → LUMO+6 (6%)                                                                     |
| 18 | 3.91 | 0.0254 | HOMO-7 → LUMO (5%)<br>HOMO-6 → LUMO+1 (5%)<br>HOMO-3 → LUMO+1 (6%)<br>HOMO-1 → LUMO+3 (7%)<br>HOMO-1 → LUMO+4 (10%)<br>HOMO → LUMO+3 (27%)                    | 43 | 43 | 4.12 | HOMO-5 → LUMO+3 (11%)<br>HOMO-5 → LUMO+4 (10%)<br>HOMO-1 → LUMO+5 (10%)<br>HOMO → LUMO+10 (6%)                                                                 |
| 19 | 3.93 | 0.0455 | HOMO-8 → LUMO (11%)<br>HOMO-7 → LUMO+1 (6%)<br>HOMO-7 → LUMO+2 (7%)<br>HOMO-3 → LUMO (5%)<br>HOMO-3 → LUMO+3 (5%)<br>HOMO → LUMO+3 (9%)<br>HOMO → LUMO+5 (6%) | 44 | 44 | 4.13 | HOMO-1 → LUMO+5 (28%)<br>HOMO-1 → LUMO+7 (7%)<br>HOMO → LUMO+9 (5%)                                                                                            |
| 20 | 3.94 | 0.0158 | HOMO-7 → LUMO (10%)<br>HOMO-3 → LUMO (22%)<br>HOMO-1 → LUMO+3 (8%)                                                                                            | 45 | 45 | 4.14 | HOMO7 → LUMO (5%)<br>HOMO1 → LUMO (46%)<br>HOMO-9 → LUMO (21%)                                                                                                 |
| 21 | 3.95 | 0.0054 | HOMO-6 → LUMO+1 (11%)<br>HOMO-5 → LUMO+1 (23%)<br>HOMO-5 → LUMO+4 (7%)                                                                                        | 46 | 46 | 4.14 | HOMO-6 → LUMO+2 (8%)<br>HOMO-5 → LUMO+3 (11%)<br>HOMO-4 → LUMO+3 (6%)<br>HOMO → LUMO+5 (8%)<br>HOMO → LUMO+7 (7%)<br>HOMO → LUMO+8 (6%)<br>HOMO → LUMO+21 (5%) |
| 22 | 3.96 | 0.0499 | HOMO-3 → LUMO (15%)<br>HOMO-3 → LUMO+2 (5%)<br>HOMO → LUMO+1 (5%)<br>HOMO → LUMO+5 (14%)                                                                      | 47 | 47 | 4.15 | HOMO-5 → LUMO+3 (13%)<br>HOMO-5 → LUMO+4 (9%)<br>HOMO-2 → LUMO+5 (5%)                                                                                          |
| 23 | 3.97 | 0.0298 | HOMO-5 → LUMO (14%)<br>HOMO-5 → LUMO+2 (18%)<br>HOMO-1 → LUMO+9 (5%)<br>HOMO-1 → LUMO+10 (5%)                                                                 | 48 | 48 | 4.17 | HOMO → LUMO+6 (6%)<br>HOMO → LUMO+7 (11%)<br>HOMO → LUMO+8 (14%)                                                                                               |
| 24 | 3.98 | 0.0004 | HOMO-4 → LUMO (5%)<br>HOMO-3 → LUMO+4 (6%)<br>HOMO-2 → LUMO+1 (17%)<br>HOMO-2 → LUMO+2 (9%)<br>HOMO-2 → LUMO+4 (11%)                                          | 49 | 49 | 4.17 | HOMO-8 → LUMO+2 (10%)<br>HOMO-7 → LUMO+3 (17%)<br>HOMO-6 → LUMO (14%)<br>HOMO-6 → LUMO+3 (6%)                                                                  |
| 25 | 4.00 | 0.0824 | HOMO-5 → LUMO (10%)<br>HOMO-1 → LUMO+7 (6%)<br>HOMO-1 → LUMO+9 (8%)<br>HOMO-1 → LUMO+21 (6%)                                                                  | 50 | 50 | 4.18 | HOMO-8 → LUMO+2 (10%)<br>HOMO-7 → LUMO+3 (6%)<br>HOMO-6 → LUMO (13%)<br>HOMO-6 → LUMO+2 (6%)<br>HOMO-4 → LUMO+1 (9%)<br>HOMO-4 → LUMO+4 (5%)                   |

<sup>a</sup> Percentage contribution in parentheses.

**Table SIX.** Calculated vertical excitations energies ( $\Delta E_{TD}$ ), oscillator strengths ( $f$ ) and main configurations for cluster 3-3-3 using TD-PBE0-D4/Def2-TZVP:GFN2-xTB for the first 50 excited states.

|    | $\Delta E_{TD}$ (eV) | $f$    | Configuration <sup>a</sup>                                                                                |    | $\Delta E_{TD}$ (eV) | $f$    | Configuration <sup>a</sup>                                                                                                                  |
|----|----------------------|--------|-----------------------------------------------------------------------------------------------------------|----|----------------------|--------|---------------------------------------------------------------------------------------------------------------------------------------------|
| 1  | 1.50                 | 0.0160 | HOMO $\rightarrow$ LUMO (97%)                                                                             | 26 | 2.17                 | 0.0006 | HOMO-6 $\rightarrow$ LUMO+1 (94%)                                                                                                           |
| 2  | 1.55                 | 0.1048 | HOMO $\rightarrow$ LUMO+1 (96%)                                                                           | 27 | 2.19                 | 0.0460 | HOMO-3 $\rightarrow$ LUMO+3 (97%)                                                                                                           |
| 3  | 1.64                 | 0.0031 | HOMO-1 $\rightarrow$ LUMO (96%)                                                                           | 28 | 2.21                 | 0.0973 | HOMO-7 $\rightarrow$ LUMO (68%)<br>HOMO-1 $\rightarrow$ LUMO+5 (24%)                                                                        |
| 4  | 1.69                 | 0.0007 | HOMO-1 $\rightarrow$ LUMO+1 (87%)<br>HOMO $\rightarrow$ LUMO+2 (7%)                                       | 29 | 2.21                 | 0.1818 | HOMO-7 $\rightarrow$ LUMO (29%)<br>HOMO-1 $\rightarrow$ LUMO+4 (6%)<br>HOMO-1 $\rightarrow$ LUMO+5 (58%)                                    |
| 5  | 1.70                 | 0.1504 | HOMO-1 $\rightarrow$ LUMO+1 (8%)<br>HOMO $\rightarrow$ LUMO+2 (88%)                                       | 30 | 2.22                 | 0.0475 | HOMO-4 $\rightarrow$ LUMO+3 (96%)                                                                                                           |
| 6  | 1.77                 | 0.0349 | HOMO $\rightarrow$ LUMO+3 (98%)                                                                           | 31 | 2.24                 | 0.6004 | HOMO $\rightarrow$ LUMO+7 (87%)<br>HOMO $\rightarrow$ LUMO+8 (5%)                                                                           |
| 7  | 1.84                 | 0.0450 | HOMO-1 $\rightarrow$ LUMO+2 (93%)                                                                         | 32 | 2.26                 | 0.0329 | HOMO-7 $\rightarrow$ LUMO+1 (94%)                                                                                                           |
| 8  | 1.84                 | 0.0023 | HOMO-2 $\rightarrow$ LUMO (94%)                                                                           | 33 | 2.27                 | 0.0182 | HOMO-1 $\rightarrow$ LUMO+6 (94%)                                                                                                           |
| 9  | 1.90                 | 0.0112 | HOMO-2 $\rightarrow$ LUMO+1 (89%)                                                                         | 34 | 2.28                 | 0.0039 | HOMO-5 $\rightarrow$ LUMO+2 (95%)                                                                                                           |
| 10 | 1.91                 | 0.0030 | HOMO-3 $\rightarrow$ LUMO (90%)                                                                           | 35 | 2.31                 | 0.0576 | HOMO-3 $\rightarrow$ LUMO+4 (15%)<br>HOMO-2 $\rightarrow$ LUMO+4 (72%)<br>HOMO-2 $\rightarrow$ LUMO+5 (5%)                                  |
| 11 | 1.92                 | 0.0478 | HOMO-1 $\rightarrow$ LUMO+3 (96%)                                                                         | 36 | 2.32                 | 0.0125 | HOMO-6 $\rightarrow$ LUMO+2 (93%)                                                                                                           |
| 12 | 1.95                 | 0.4351 | HOMO-4 $\rightarrow$ LUMO (60%)<br>HOMO $\rightarrow$ LUMO+4 (33%)                                        | 37 | 2.34                 | 0.0131 | HOMO-5 $\rightarrow$ LUMO+3 (97%)                                                                                                           |
| 13 | 1.95                 | 0.4611 | HOMO-4 $\rightarrow$ LUMO (37%)<br>HOMO $\rightarrow$ LUMO+4 (54%)<br>HOMO $\rightarrow$ LUMO+5 (6%)      | 38 | 2.38                 | 0.2567 | HOMO-9 $\rightarrow$ LUMO (49%)<br>HOMO-8 $\rightarrow$ LUMO (23%)<br>HOMO-3 $\rightarrow$ LUMO+4 (14%)<br>HOMO-2 $\rightarrow$ LUMO+4 (5%) |
| 14 | 1.97                 | 0.0068 | HOMO-3 $\rightarrow$ LUMO+1 (92%)                                                                         | 39 | 2.38                 | 0.0065 | HOMO-9 $\rightarrow$ LUMO (15%)<br>HOMO-8 $\rightarrow$ LUMO (6%)<br>HOMO-3 $\rightarrow$ LUMO+4 (49%)<br>HOMO-2 $\rightarrow$ LUMO+4 (16%) |
| 15 | 2.01                 | 0.0126 | HOMO-4 $\rightarrow$ LUMO+1 (96%)                                                                         | 40 | 2.38                 | 0.3425 | HOMO-1 $\rightarrow$ LUMO+7 (80%)<br>HOMO $\rightarrow$ LUMO+8 (8%)                                                                         |
| 16 | 2.04                 | 0.0005 | HOMO-2 $\rightarrow$ LUMO+2 (93%)                                                                         | 41 | 2.38                 | 0.0480 | HOMO-1 $\rightarrow$ LUMO+7 (5%)<br>HOMO $\rightarrow$ LUMO+7 (6%)<br>HOMO $\rightarrow$ LUMO+8 (81%)                                       |
| 17 | 2.06                 | 0.3149 | HOMO $\rightarrow$ LUMO+4 (9%)<br>HOMO $\rightarrow$ LUMO+5 (84%)                                         | 42 | 2.39                 | 0.0372 | HOMO-6 $\rightarrow$ LUMO+3 (95%)                                                                                                           |
| 18 | 2.07                 | 0.0025 | HOMO-5 $\rightarrow$ LUMO (98%)                                                                           | 43 | 2.39                 | 0.0672 | HOMO-3 $\rightarrow$ LUMO+4 (5%)<br>HOMO-2 $\rightarrow$ LUMO+5 (87%)                                                                       |
| 19 | 2.08                 | 0.0651 | HOMO-1 $\rightarrow$ LUMO+4 (86%)<br>HOMO-1 $\rightarrow$ LUMO+5 (11%)                                    | 44 | 2.40                 | 0.0247 | HOMO-9 $\rightarrow$ LUMO (28%)<br>HOMO-8 $\rightarrow$ LUMO (66%)                                                                          |
| 20 | 2.11                 | 0.0018 | HOMO-3 $\rightarrow$ LUMO+2 (61%)<br>HOMO-2 $\rightarrow$ LUMO+3 (32%)                                    | 45 | 2.41                 | 0.0167 | HOMO-7 $\rightarrow$ LUMO+2 (94%)                                                                                                           |
| 21 | 2.11                 | 0.0926 | HOMO-6 $\rightarrow$ LUMO (65%)<br>HOMO-3 $\rightarrow$ LUMO+2 (17%)<br>HOMO-2 $\rightarrow$ LUMO+3 (14%) | 46 | 2.42                 | 1.0016 | HOMO-9 $\rightarrow$ LUMO+1 (76%)<br>HOMO-8 $\rightarrow$ LUMO+1 (14%)                                                                      |
| 22 | 2.11                 | 0.0208 | HOMO-6 $\rightarrow$ LUMO (30%)<br>HOMO-3 $\rightarrow$ LUMO+2 (14%)<br>HOMO-2 $\rightarrow$ LUMO+3 (51%) | 47 | 2.44                 | 0.0775 | HOMO-4 $\rightarrow$ LUMO+4 (94%)                                                                                                           |
| 23 | 2.13                 | 0.0107 | HOMO-5 $\rightarrow$ LUMO+1 (92%)                                                                         | 48 | 2.46                 | 0.1034 | HOMO-9 $\rightarrow$ LUMO+1 (15%)<br>HOMO-8 $\rightarrow$ LUMO+1 (80%)                                                                      |
| 24 | 2.14                 | 0.2707 | HOMO $\rightarrow$ LUMO+6 (95%)                                                                           | 49 | 2.47                 | 0.5958 | HOMO-4 $\rightarrow$ LUMO+5 (27%)<br>HOMO-3 $\rightarrow$ LUMO+4 (5%)<br>HOMO-3 $\rightarrow$ LUMO+5 (57%)                                  |
| 25 | 2.16                 | 0.0001 | HOMO-4 $\rightarrow$ LUMO+2 (95%)                                                                         | 50 | 2.47                 | 0.6219 | HOMO-10 $\rightarrow$ LUMO (86%)                                                                                                            |

<sup>a</sup> Percentage contribution in parentheses.

**Table SX.** Calculated vertical excitations energies ( $\Delta E_{TD}$ ), oscillator strengths ( $f$ ) and main configurations for cluster 4-3-3 using TD-PBE0-D4/Def2-TZVP:GFN2-xTB for the first 50 excited states.

|    | $\Delta E_{TD}$ (eV) | $f$    | Configuration <sup>a</sup>                                         |    | $\Delta E_{TD}$ (eV) | $f$    | Configuration <sup>a</sup>                                                                                   |
|----|----------------------|--------|--------------------------------------------------------------------|----|----------------------|--------|--------------------------------------------------------------------------------------------------------------|
| 1  | 1.74                 | 0.0028 | HOMO $\rightarrow$ LUMO (99%)                                      | 26 | 2.52                 | 0.0122 | HOMO-1 $\rightarrow$ LUMO+4 (93%)                                                                            |
| 2  | 1.86                 | 0.0151 | HOMO $\rightarrow$ LUMO+1 (98%)                                    | 27 | 2.54                 | 0.0305 | HOMO $\rightarrow$ LUMO+8 (34%)<br>HOMO $\rightarrow$ LUMO+9 (63%)                                           |
| 3  | 2.01                 | 0.0274 | HOMO $\rightarrow$ LUMO+2 (98%)                                    | 28 | 2.55                 | 0.0626 | HOMO-2 $\rightarrow$ LUMO+4 (90%)                                                                            |
| 4  | 2.03                 | 0.0001 | HOMO-1 $\rightarrow$ LUMO (98%)                                    | 29 | 2.56                 | 0.0032 | HOMO-8 $\rightarrow$ LUMO (89%)                                                                              |
| 5  | 2.06                 | 0.0002 | HOMO-2 $\rightarrow$ LUMO (98%)                                    | 30 | 2.56                 | 0.1834 | HOMO-6 $\rightarrow$ LUMO+1 (64%)<br>HOMO-5 $\rightarrow$ LUMO+1 (26%)                                       |
| 6  | 2.15                 | 0.0094 | HOMO-1 $\rightarrow$ LUMO+1 (98%)                                  | 31 | 2.56                 | 0.0016 | HOMO $\rightarrow$ LUMO+8 (63%)<br>HOMO $\rightarrow$ LUMO+9 (33%)                                           |
| 7  | 2.18                 | 0.0001 | HOMO-3 $\rightarrow$ LUMO (98%)                                    | 32 | 2.57                 | 0.0006 | HOMO-6 $\rightarrow$ LUMO+1 (28%)<br>HOMO-5 $\rightarrow$ LUMO+1 (70%)                                       |
| 8  | 2.18                 | 0.0003 | HOMO-2 $\rightarrow$ LUMO+1 (97%)                                  | 33 | 2.60                 | 0.2681 | HOMO-1 $\rightarrow$ LUMO+5 (35%)<br>HOMO-1 $\rightarrow$ LUMO+6 (59%)                                       |
| 9  | 2.18                 | 0.1050 | HOMO $\rightarrow$ LUMO+3 (91%)<br>HOMO $\rightarrow$ LUMO+4 (6%)  | 34 | 2.63                 | 0.0523 | HOMO-7 $\rightarrow$ LUMO+1 (84%)<br>HOMO-3 $\rightarrow$ LUMO+3 (9%)                                        |
| 10 | 2.22                 | 0.0013 | HOMO-4 $\rightarrow$ LUMO (99%)                                    | 35 | 2.63                 | 0.0367 | HOMO-7 $\rightarrow$ LUMO+1 (10%)<br>HOMO-3 $\rightarrow$ LUMO+3 (86%)                                       |
| 11 | 2.22                 | 0.1737 | HOMO $\rightarrow$ LUMO+3 (5%)<br>HOMO $\rightarrow$ LUMO+4 (92%)  | 36 | 2.63                 | 0.0595 | HOMO-1 $\rightarrow$ LUMO+5 (60%)<br>HOMO-1 $\rightarrow$ LUMO+6 (34%)                                       |
| 12 | 2.29                 | 0.0149 | HOMO-1 $\rightarrow$ LUMO+2 (96%)                                  | 37 | 2.64                 | 0.0406 | HOMO-11 $\rightarrow$ LUMO (6%)<br>HOMO-9 $\rightarrow$ LUMO (85%)                                           |
| 13 | 2.30                 | 0.0001 | HOMO-3 $\rightarrow$ LUMO+1 (98%)                                  | 38 | 2.65                 | 0.0192 | HOMO $\rightarrow$ LUMO+10 (95%)                                                                             |
| 14 | 2.32                 | 0.5843 | HOMO $\rightarrow$ LUMO+5 (73%)<br>HOMO $\rightarrow$ LUMO+6 (23%) | 39 | 2.65                 | 0.1841 | HOMO-2 $\rightarrow$ LUMO+5 (37%)<br>HOMO-2 $\rightarrow$ LUMO+6 (57%)                                       |
| 15 | 2.33                 | 0.0045 | HOMO-2 $\rightarrow$ LUMO+2 (93%)                                  | 40 | 2.66                 | 0.0078 | HOMO-11 $\rightarrow$ LUMO (77%)<br>HOMO-9 $\rightarrow$ LUMO (8%)<br>HOMO-4 $\rightarrow$ LUMO+3 (5%)       |
| 16 | 2.34                 | 0.0011 | HOMO-4 $\rightarrow$ LUMO+1 (95%)                                  | 41 | 2.66                 | 0.0024 | HOMO-4 $\rightarrow$ LUMO+3 (90%)                                                                            |
| 17 | 2.34                 | 0.9990 | HOMO $\rightarrow$ LUMO+5 (22%)<br>HOMO $\rightarrow$ LUMO+6 (72%) | 42 | 2.67                 | 0.0365 | HOMO-3 $\rightarrow$ LUMO+4 (96%)                                                                            |
| 18 | 2.43                 | 0.0326 | HOMO-6 $\rightarrow$ LUMO (65%)<br>HOMO-5 $\rightarrow$ LUMO (32%) | 43 | 2.67                 | 0.0611 | HOMO-2 $\rightarrow$ LUMO+5 (58%)<br>HOMO-2 $\rightarrow$ LUMO+6 (37%)                                       |
| 19 | 2.43                 | 0.0056 | HOMO-6 $\rightarrow$ LUMO (32%)<br>HOMO-5 $\rightarrow$ LUMO (66%) | 44 | 2.68                 | 0.0162 | HOMO-8 $\rightarrow$ LUMO+1 (91%)                                                                            |
| 20 | 2.46                 | 0.0172 | HOMO-3 $\rightarrow$ LUMO+2 (98%)                                  | 45 | 2.69                 | 0.0006 | HOMO1 $\rightarrow$ LUMO (94%)                                                                               |
| 21 | 2.47                 | 0.0073 | HOMO-1 $\rightarrow$ LUMO+3 (94%)                                  | 46 | 2.70                 | 0.0034 | HOMO-6 $\rightarrow$ LUMO+2 (17%)<br>HOMO-5 $\rightarrow$ LUMO+2 (76%)                                       |
| 22 | 2.49                 | 0.0018 | HOMO-4 $\rightarrow$ LUMO+2 (98%)                                  | 47 | 2.70                 | 0.0427 | HOMO-4 $\rightarrow$ LUMO+4 (95%)                                                                            |
| 23 | 2.50                 | 0.0236 | HOMO $\rightarrow$ LUMO+6 (97%)                                    | 48 | 2.73                 | 0.0031 | HOMO-6 $\rightarrow$ LUMO+2 (78%)<br>HOMO-5 $\rightarrow$ LUMO+2 (17%)                                       |
| 24 | 2.50                 | 0.0023 | HOMO-7 $\rightarrow$ LUMO (93%)                                    | 49 | 2.77                 | 0.1404 | HOMO-11 $\rightarrow$ LUMO+1 (15%)<br>HOMO-9 $\rightarrow$ LUMO+1 (59%)<br>HOMO-7 $\rightarrow$ LUMO+2 (11%) |
| 25 | 2.51                 | 0.0113 | HOMO-2 $\rightarrow$ LUMO+3 (91%)                                  | 50 | 2.77                 | 0.0800 | HOMO-9 $\rightarrow$ LUMO+1 (18%)<br>HOMO-7 $\rightarrow$ LUMO+2 (71%)                                       |

<sup>a</sup> Percentage contribution in parentheses.

**Table SXI.** Calculated vertical excitations energies ( $\Delta E_{TD}$ ), oscillator strengths ( $f$ ) and main configurations for cluster 4-4-4 using TD-PBE0-D4/Def2-TZVP:GFN2-xTB for the first 10 excited states.

|   | $\Delta E_{TD}$ (eV) | $f$    | Configuration <sup>a</sup>      |    | $\Delta E_{TD}$ (eV) | $f$    | Configuration <sup>a</sup>                                           |
|---|----------------------|--------|---------------------------------|----|----------------------|--------|----------------------------------------------------------------------|
| 1 | 1.50                 | 0.0017 | HOMO $\rightarrow$ LUMO (99%)   | 6  | 1.85                 | 0.0004 | HOMO-3 $\rightarrow$ LUMO (12%)<br>HOMO-1 $\rightarrow$ LUMO+1 (85%) |
| 2 | 1.65                 | 0.0012 | HOMO-1 $\rightarrow$ LUMO (99%) | 7  | 1.85                 | 0.0001 | HOMO-3 $\rightarrow$ LUMO (78%)<br>HOMO-1 $\rightarrow$ LUMO+1 (14%) |
| 3 | 1.69                 | 0.0017 | HOMO $\rightarrow$ LUMO+1 (99%) | 8  | 1.89                 | 0.0001 | HOMO-4 $\rightarrow$ LUMO (89%)<br>HOMO-3 $\rightarrow$ LUMO (7%)    |
| 4 | 1.76                 | 0.0059 | HOMO-2 $\rightarrow$ LUMO (98%) | 9  | 1.91                 | 0.0066 | HOMO-6 $\rightarrow$ LUMO (22%)<br>HOMO-5 $\rightarrow$ LUMO (70%)   |
| 5 | 1.78                 | 0.0006 | HOMO $\rightarrow$ LUMO+2 (99%) | 10 | 1.94                 | 0.0000 | HOMO-6 $\rightarrow$ LUMO (10%)<br>HOMO-1 $\rightarrow$ LUMO+2 (87%) |

<sup>a</sup> Percentage contribution in parentheses.

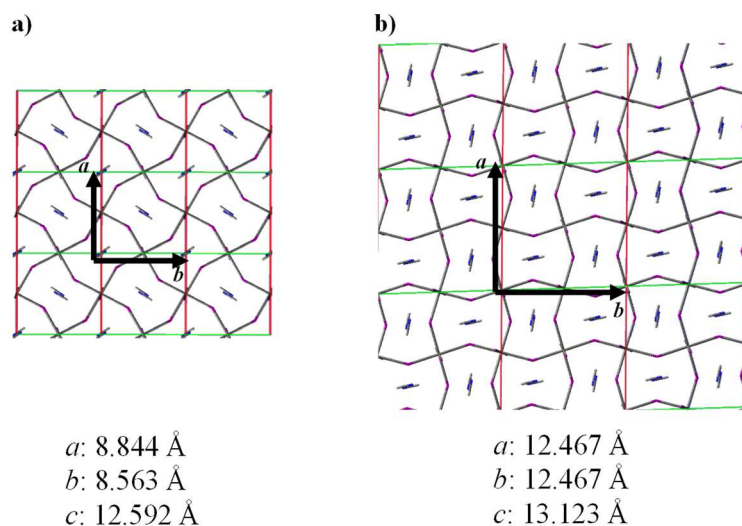

**Figure S1.** a) (*quasi*-)orthorhombic unit cell of the MAPI perovskite. Taken from Varadwaj *et al.*<sup>1</sup>; b) (*quasi*-)cubic unit cell used in this work for the construction of cluster models.

## References

- (1) Varadwaj, P. R.; Varadwaj, A.; Marques, H. M.; Yamashita, K. Significance of hydrogen bonding and other noncovalent interactions in determining octahedral tilting in the CH<sub>3</sub>NH<sub>3</sub>PbI<sub>3</sub> hybrid organic-inorganic halide perovskite solar cell semiconductor. *Sci. Rep* **2019**, *9*, 50. DOI: 10.1038/s41598-018-36218-1.
